# Supplementary material for: Mitochondrial OXA Translocase Plays a Major Role in Biogenesis of Inner-Membrane Proteins
Source: PubMed Central journal article supplement — Cell Metab. 2016 May 10;23(5):901–8. doi: 10.1016/j.cmet.2016.04.005 (PMC4873616; doi:10.1016/j.cmet.2016.04.005), 2016-05-10
Supplement: mmc1.pdf [file mmc1.pdf]

**Cell Metabolism, Volume 23**

**Supplemental Information**

**Mitochondrial OXA Translocase Plays a Major Role  
in Biogenesis of Inner-Membrane Proteins**

**Sebastian B. Stiller, Jan Höpker, Silke Oeljeklaus, Conny Schütze, Sandra G. Schrempp, Jens Vent-Schmidt, Susanne E. Horvath, Ann E. Frazier, Natalia Gebert, Martin van der Laan, Maria Bohnert, Bettina Warscheid, Nikolaus Pfanner, and Nils Wiedemann**

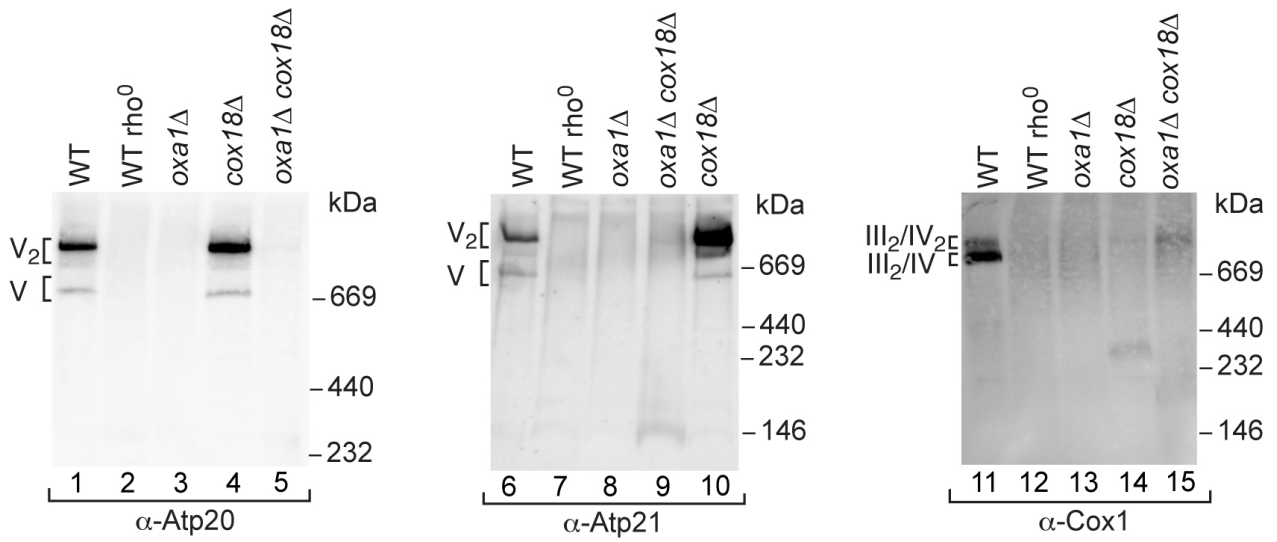

**Figure S1. Defects of Oxidative Phosphorylation Complexes in Oxa1-deficient Mitochondria, Related to Figure 1**

Mitochondria were isolated from wild-type (WT), WT rho<sup>0</sup>, oxa1 $\Delta$ , cox18 $\Delta$  and oxa1 $\Delta$  cox18 $\Delta$  yeast, lysed with digitonin and analyzed by blue native electrophoresis and immunoblotting with the indicated antisera. V, complex V (F<sub>1</sub>F<sub>o</sub>-ATP synthase); V<sub>2</sub>, ATP synthase dimer; III<sub>2</sub>/IV and III<sub>2</sub>/IV<sub>2</sub>, respiratory chain supercomplexes of complex III and complex IV.

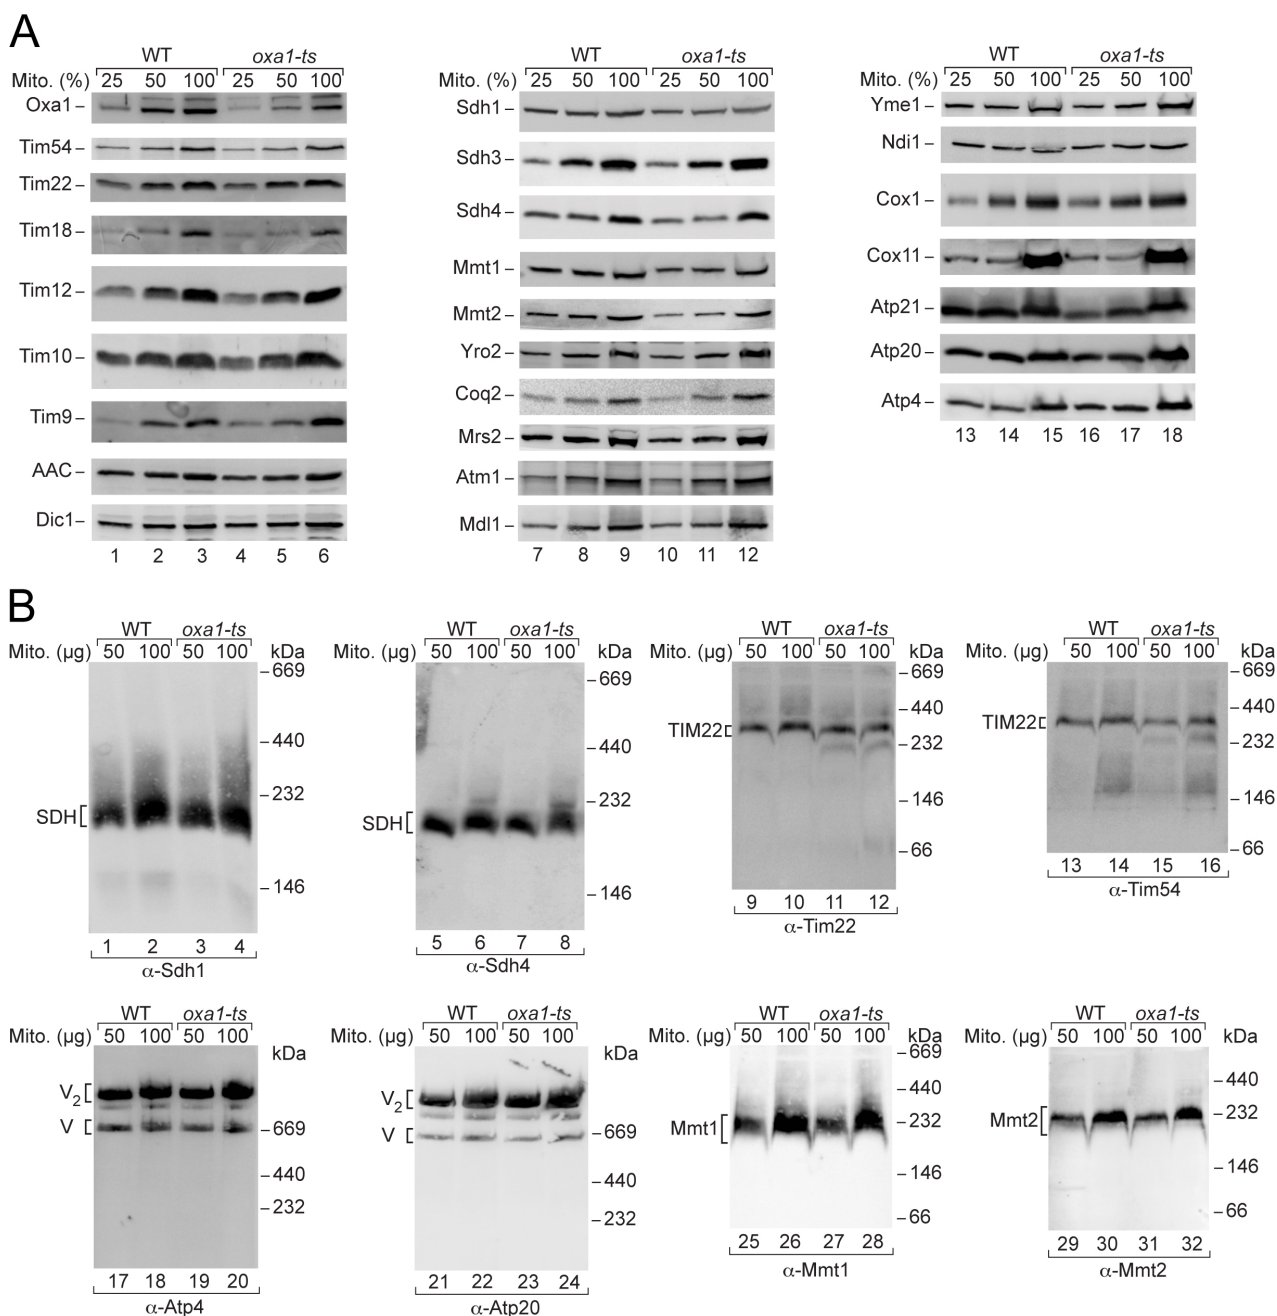

**Figure S2. Characterization of Mitochondria Isolated After Growth of *oxa1-ts* Yeast at Permissive Conditions, Related to Figure 2**

(A) Wild-type (WT) and *oxa1-ts* yeast cells were grown at 21°C. Mitochondria were isolated and protein levels were analyzed by SDS-PAGE and immunoblotting with antisera against the indicated proteins. Mito., total mitochondrial protein; 100% represents 160  $\mu$ g protein (80  $\mu$ g for Tim54, Tim22, Tim12, Tim10, AAC, Dic1, Coq2, Atm1, Mdl1 and Ndi1; 40  $\mu$ g for Oxa1, Tim9 and Sdh3).

(B) Mitochondria isolated from WT and *oxa1-ts* cells were lysed with 1% digitonin and subjected to blue native electrophoresis and immunoblotting. Without a heat shock, *oxa1-ts* mitochondria have a mild assembly defect, evidenced by a sub-assembled TIM22 complex of ~230 kDa of low abundance (lanes 11, 12, 15 and 16) and reduced levels of the [<sup>35</sup>S]Tim18-Sdh3 assembly intermediate seen in Figure 2C.

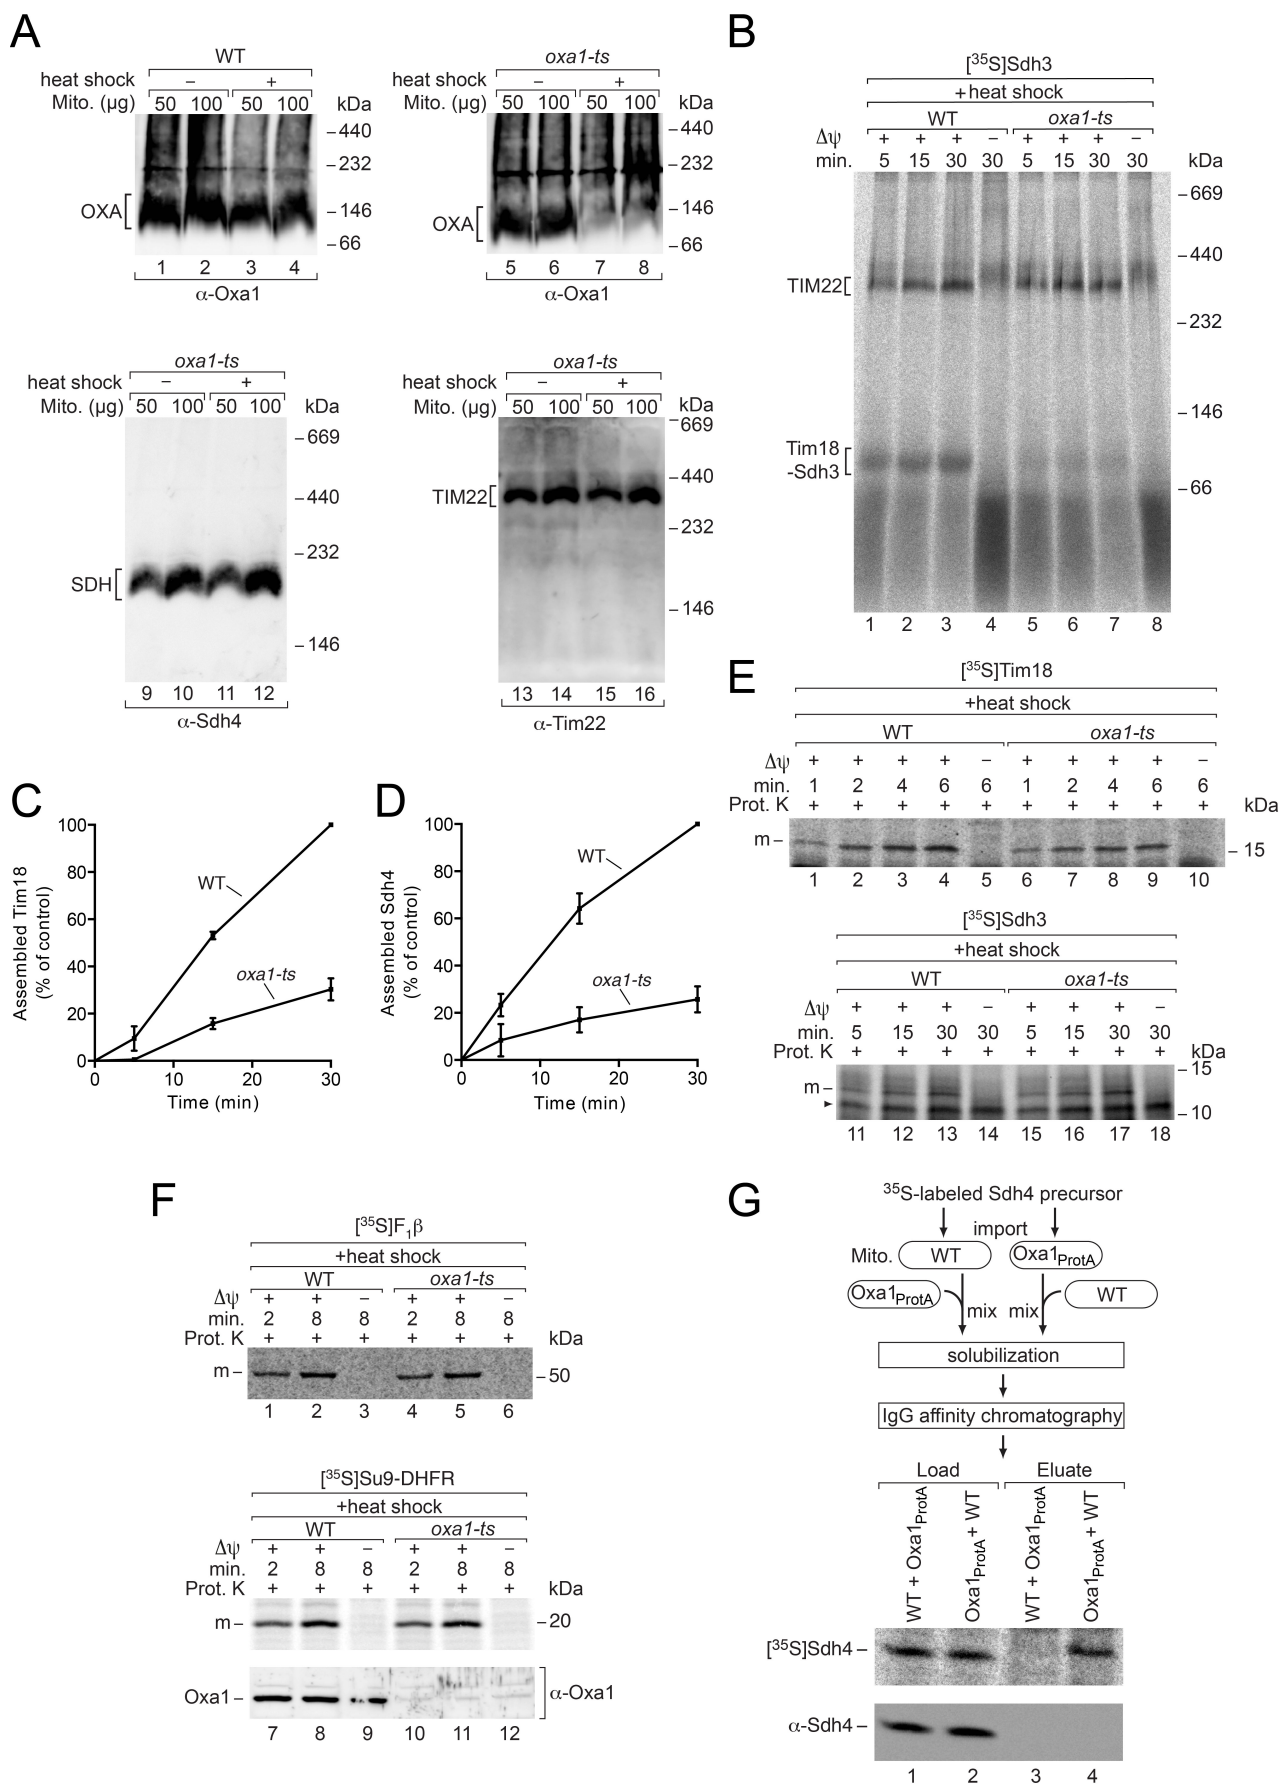

Figure S3

**Figure S3. Characterization of Import and Assembly in *oxa1-ts* Mitochondria, Related to Figure 2**

(A) Wild-type (WT) or *oxa1-ts* mitochondria were suspended in import buffer supplemented with 4 mM ATP, followed by either a 12 min heat shock at 37°C or incubation at 25°C. Mitochondria were washed, lysed with digitonin and analyzed by blue native electrophoresis and immunoblotting.

(B) Assembly of Sdh3 in WT and *oxa1-ts* mitochondria. Isolated mitochondria were heat-shocked for 12 min at 37°C. [<sup>35</sup>S]Sdh3 precursor was imported in the presence of non-radiolabeled Tim18 (Gebert et al., 2011) at 25°C, followed by proteinase K treatment. Formation of the Tim18-Sdh3 assembly intermediate and the TIM22 complex were analyzed by blue native electrophoresis and digital autoradiography. Assembly of [<sup>35</sup>S]Sdh3 into the TIM22 complex requires the presence of sufficient amounts of Tim18 precursor (supplied in chemical amounts from wheat germ lysate; Gebert et al., 2011). The activity of Oxa1 is rate-limiting for the first assembly step (Tim18-Sdh3 intermediate); [<sup>35</sup>S]Sdh3 reaching this intermediate is then rapidly assembled into the TIM22 complex.

(C, D) <sup>35</sup>S-labeled Tim18 (C) or Sdh4 precursor (D) were imported into in vitro heat-treated (12 min at 37°C) WT and *oxa1-ts* mitochondria at 25°C (C) or 30°C (D). Non-imported precursor was removed by addition of proteinase K. <sup>35</sup>S-labeled assembled complexes were analyzed by blue native electrophoresis and quantified by digital autoradiography (mature TIM22 complex (C) or sum of Sdh3-Sdh4 intermediate and mature SDH complex (D)). The assembly yield in WT mitochondria after 30 min import was set to 100% (control). The results are shown as mean ± SEM (n=3 independent experiments; mean with range of two independent experiments for the 15 min time point of (C)).

(E) Radiolabeled Tim18 (lanes 1-10) or Sdh3 precursors (lanes 11-18) were imported into WT and *oxa1-ts* mitochondria at 25°C (Tim18) or 30°C (Sdh3) for the indicated periods. Mitochondria were heat-shocked for 12 min at 37°C before the import reaction. Non-imported precursors were removed by proteinase K. Import was analyzed by SDS-PAGE and autoradiography. m, mature form; arrowhead, unspecific band.

(F) WT and *oxa1-ts* mitochondria were subjected to an in vitro heat shock (37°C) and incubated with the <sup>35</sup>S-labeled precursors of F<sub>1</sub>β (F<sub>1</sub>-ATPase subunit β /Atp2) and Su9-DHFR (fusion protein between the presequence of *Neurospora crassa* F<sub>0</sub>-ATPase subunit 9 and mouse dihydrofolate reductase) at 25°C, followed by treatment with proteinase K. The mitochondria were analyzed by SDS-PAGE and autoradiography (upper and middle panels) or immunodecoration (lower panel).

(G) [<sup>35</sup>S]Sdh4 precursor was imported into WT or Oxa1<sub>ProtA</sub> mitochondria for 8 min at 30°C. After removal of non-imported precursor by proteinase K, [<sup>35</sup>S]Sdh4-containing mitochondria were mixed with unlabeled mitochondria of the other type as indicated. Mitochondria were solubilized with 1% digitonin and subjected to IgG affinity chromatography, followed by elution with TEV protease. Samples were analyzed by SDS-PAGE and autoradiography (upper panel) or immunodecoration (lower panel). Load 0.15%; eluate 100%. [<sup>35</sup>S]Sdh4 was only co-purified with tagged Oxa1 when it was imported into Oxa1<sub>ProtA</sub> mitochondria, excluding a post-lysis interaction of the precursor with Oxa1<sub>ProtA</sub>.

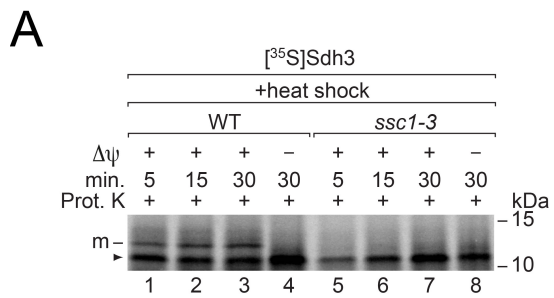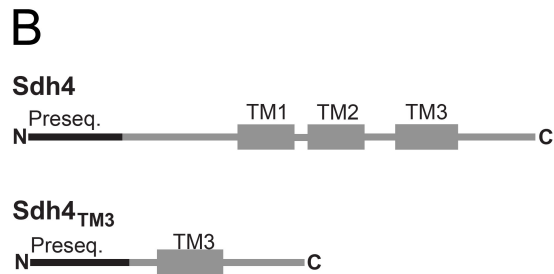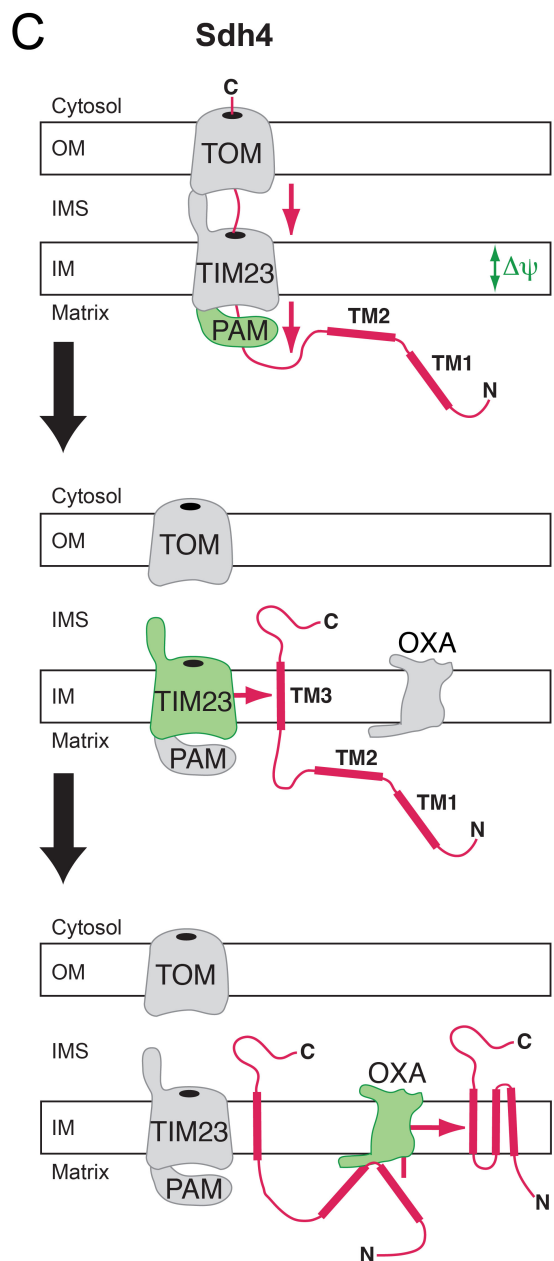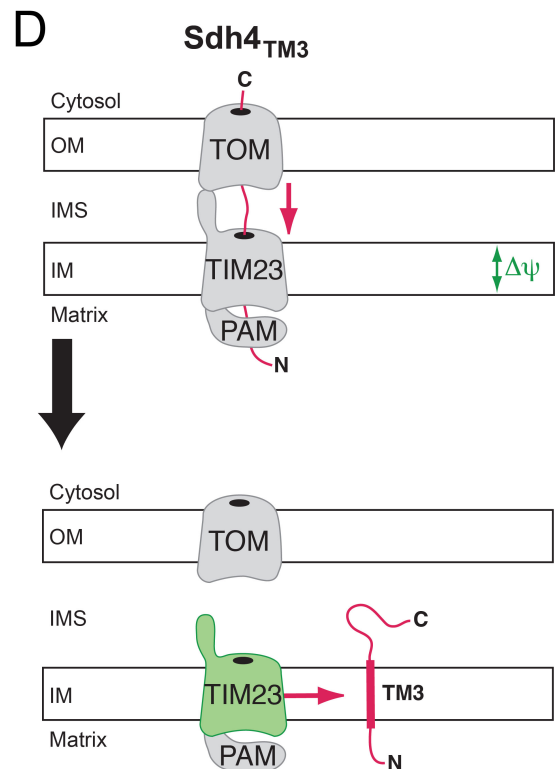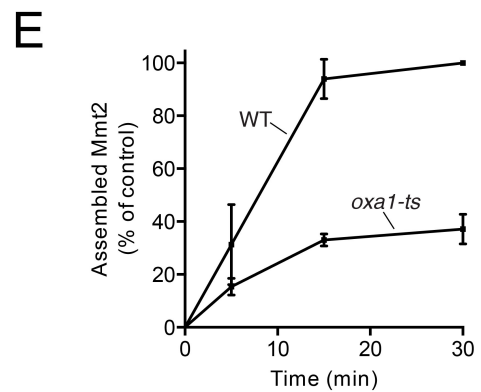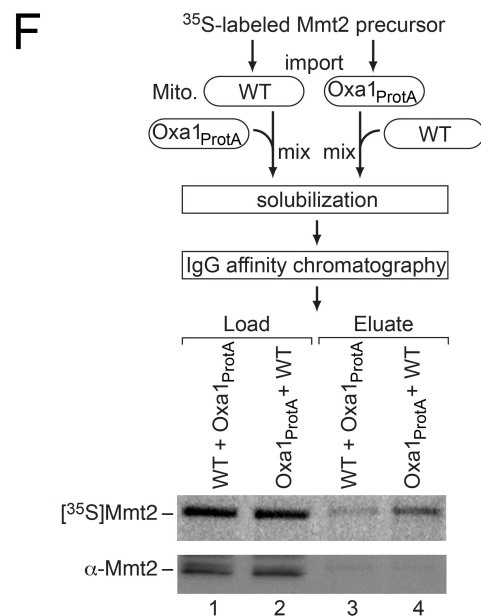

Figure S4

**Figure S4. Import Experiments into Mutant Mitochondria and Hypothetical Model of the Sdh4 Sorting Pathway, Related to Figures 3 and 4**

(A) Isolated wild-type (WT) and *ssc1-3* mitochondria were heat-shocked for 12 min at 37°C, followed by import of radiolabeled Sdh3 precursor at 30°C. After removal of non-imported precursor by proteinase K, samples were analyzed by SDS-PAGE and autoradiography. m, mature form; arrowhead, unspecific band.

(B) Scheme of presequence (Preseq.) and transmembrane (TM) segments of Sdh4 and Sdh4<sub>TM3</sub>.

(C, D) Hypothetical model of the mitochondrial sorting pathways of Sdh4 (C) and Sdh4<sub>TM3</sub> (D).

(D). OM, outer mitochondrial membrane; IMS, intermembrane space; IM, inner mitochondrial membrane.

(E) [<sup>35</sup>S]Mmt2 was imported into in vitro heat-shocked (12 min at 37°C) WT and *oxa1-ts* mitochondria, followed by proteinase K treatment. Mitochondria were analyzed by blue native electrophoresis and Mmt2 assembly was quantified by digital autoradiography. The assembly yield in WT mitochondria after 30 min import was set to 100% (control). The results are shown as mean ± SEM (n=3 independent experiments).

(F) [<sup>35</sup>S]Mmt2 precursor was imported into WT or Oxa1<sub>ProtA</sub> mitochondria for 10 min at 30°C and analyzed as described in the legend of Figure S3G, revealing that [<sup>35</sup>S]Mmt2 was specifically co-purified with tagged Oxa1 only when it was imported into Oxa1<sub>ProtA</sub> mitochondria.

## SUPPLEMENTAL EXPERIMENTAL PROCEDURES

### Generation of Yeast Strains and Cloning

Table S2 summarizes the *S. cerevisiae* strains used. Individual chromosomal deletions of *COX18* and *OXA1* were generated by their substitution with a *His3MX6* cassette (Longtine et al., 1998). For chromosomal deletion of the *COX18* gene in *oxa1* $\Delta$  yeast, an *URA3* cassette was introduced (Berben et al., 1991). For PCR amplification of integration cassettes, flanked by sequences homologous to the 5' untranslated region (UTR) and 3'-UTR of the selected open reading frame, the KOD Hot Start Master Mix (Merck Millipore) was used. For transformation of yeast strains the lithium acetate/single-stranded carrier DNA/polyethylene glycol method (Gietz and Woods, 2002) was employed and verified by PCR or Western blot analysis. The Sdh4<sub>TM3</sub> precursor consists of the N-terminal Sdh4 presequence (amino acid residues 1-31 according to Vögtle et al., 2009) followed by the C-terminus of Sdh4 (amino acid residues 121-181). To generate the [<sup>35</sup>S]Mmt2 precursor, a PCR product encoding amino acid residues 1 to 450 (including presequence and all five TMs) was used.

### Plasmids Used in This Study

| Name                        | Backbone  | Insert                                                                    | Source                     | Number |
|-----------------------------|-----------|---------------------------------------------------------------------------|----------------------------|--------|
| pGEM-AAC                    | pGEM-4Z   | <i>S. cerevisiae</i> AAC2                                                 | Wiedemann et al., 2001     | 1039   |
| pGEM-Dic1                   | pGEM      | BamHI-DIC1 ( <i>S. cerevisiae</i> )-EcoRI                                 | Pfanner/<br>Wiedemann Labs | A32    |
| pGEM-Su9-DHFR               | pGEM      | EcoRI-Su9(1-69, <i>N. crassa</i> )-DHFR(mouse)-HindIII                    | Pfanner/<br>Wiedemann Labs | SO2    |
| pGEM-F <sub>1</sub> $\beta$ | pSP64     | HindIII-F <sub>1</sub> $\beta$ ( <i>S. cerevisiae</i> )-HindIII           | Pfanner/<br>Wiedemann Labs | F01    |
| YDp-U                       | pUC9HStop | HindIII-URA3-Smal                                                         | Berben et al., 1991        | X45    |
| pFA6a-His3MX6               | pFA6      | BamHI-P <sub>TEV</sub> -his5+ ( <i>S. pombe</i> )-T <sub>TEV</sub> -EcoRI | Wach, 1996                 | 1424   |



## PCR Primers Used in This Study

| Name                      | Sequence (5' → 3')                                                        | Description                                                                                                     |
|---------------------------|---------------------------------------------------------------------------|-----------------------------------------------------------------------------------------------------------------|
| COQ2 SP6 fw               | GATCGATTTAGGTGACACTATAGAAGCGGC<br>CACCATGTTTATTTGGCAGAGAAAGAGTATT<br>TTAC | Generation of SP6-Coq2<br>PCR template for RNA<br>synthesis                                                     |
| COQ2 rev                  | CTACAAGAATCCAACAGTCTCAAG                                                  |                                                                                                                 |
| SP6_Sdh4_f_<br>SBS        | TCGATTTAGGTGACACTATAGAATACGCCGC<br>CGCCGATCTTTCCTACGCTTTTCG               | Generation of SP6-Sdh4<br>PCR template for RNA<br>synthesis; generation of<br>SP6-Sdh4 <sub>TM3</sub> construct |
| Sdh4_rc_SBS               | CTACTTCTTGGCTTCAATC                                                       |                                                                                                                 |
| Sp6Tim18                  | TCGATTTAGGTGACACTATAGAATACGCCGC<br>CGCCATGCTATTGT                         | Generation of SP6-<br>Tim18 PCR template for<br>RNA synthesis                                                   |
| Tim18rc                   | TATGGGTGAGTCAGTTTCTTC                                                     |                                                                                                                 |
| MMT2 SP6 fw               | GATCGATTTAGGTGACACTATAGAAGCGGC<br>CACCATGCTACGGATAAGTATTGACTCTATC         | Generation of SP6-Mmt2<br>PCR template for RNA<br>synthesis                                                     |
| MMT2 rev ( $\Delta 451$ ) | TTACATCAACAAACTCGACGTCCAC                                                 |                                                                                                                 |
| Sdh3_SP6_fwd              | TCGATTTAGGTGACACTATAGAATACGCCGC<br>CGCCGCATAGAAATCTCAGGACC                | Generation of SP6-Sdh3<br>PCR template for RNA<br>synthesis                                                     |
| Sdh3_rev                  | TCATAAAGTTAATAAATAAGTACCGAG                                               |                                                                                                                 |
| Sdh4_linker_f             | ATTTCTGAAAGAGTTTATGGTG                                                    | Generation of SP6-<br>Sdh4 <sub>TM3</sub> construct                                                             |
| Sdh4_linker_rev           | CACCATAAACTCTTTCAGAAATGCTCTTCTTA<br>GCGGTAGAC                             |                                                                                                                 |
| Mmt1_RWG_<br>sense        | CTTTAAGAAGGAGATATACCATGTTAAGAAT<br>CTGCGTAAAAGG                           | Generation of Mmt1<br>template DNA using the<br>RTS <sup>TM</sup> Wheat Germ<br>LinTempGenSet                   |
| Mmt1_RWG_anti             | TGATGATGAGAACCCCCCTCAAATATGAG<br>TATTCGTATGG                              |                                                                                                                 |
| Tim18_RWG_<br>sense       | CTTTAAGAAGGAGATATACCATGCTATTGTTT<br>CCTGGCTTG                             | Generation of Tim18<br>template DNA using the<br>RTS <sup>TM</sup> Wheat Germ<br>LinTempGenSet                  |
| Tim18_RWG_<br>anti        | TGATGATGAGAACCCCCCTCAGTTTCTTC<br>CAAATATATACAA                            |                                                                                                                 |
| Cox18d_YDp_f2             | AAGGTCCAAGGATAGGAAAATTTCAAGATAA<br>AGTATGGCATTGAATTCCCGGGGATCC            | Genomic deletion of<br>COX18 ORF                                                                                |
| Cox18d_YDp_r2             | CTGATGTAGAATTACATATCCTATCTATGCGT<br>CAGCTTCACGCTAGCTTGGCTGCAG             |                                                                                                                 |
| Cox18_test_f              | CTACCGTCCAGTAATTC                                                         | Verification of genomic<br>COX18 deletion                                                                       |
| Cox18_test_r              | GTTTATTTACAAGCTGATGTAG                                                    |                                                                                                                 |

## Mass Spectrometry and Data Analysis

For the SILAC-based quantitative MS analysis of wild-type yeast and an *oxa1 cox18* double deletion strain (*oxa1* $\Delta$  *cox18* $\Delta$ ), equal amounts of Lys8/Arg10-labeled wild-type and non-isotopically labeled mutant cells were mixed based on optical densities before isolation of crude mitochondria. Proteins of the mitochondrial fraction (4  $\mu$ g protein per LC/MS run) were precipitated with acetone, resuspended in 8 M urea/50 mM NH<sub>4</sub>HCO<sub>3</sub>, and subjected to reduction with TCEP and alkylation with iodoacetamide followed by

tryptic digestion as described (Lytovchenko et al., 2014). The generated peptides were analyzed by LC/MS using an Ultimate 3000 RSLCnano HPLC system (Thermo Scientific, Dreieich, Germany) directly coupled to an Orbitrap Elite mass spectrometer (Thermo Scientific, Bremen, Germany). Peptides were preconcentrated and washed on a 5 mm x 0.3 mm PepMap<sup>TM</sup> C18  $\mu$ -precolumn (Thermo Scientific) for 25 – 30 min and separated on a 50 cm x 75  $\mu$ m C18 reversed-phase nano LC column (Acclaim PepMap<sup>TM</sup> RSLC column; particle size 2  $\mu$ m; pore size 100 Å; Thermo Scientific) at 40°C using a binary solvent system consisting of 0.1% (v/v) formic acid (solvent A) and 50% (v/v) methanol/30% (v/v) acetonitrile in 0.1% (v/v) formic acid (solvent B). For peptide elution, a linear gradient of 5 – 62% solvent B followed by 62 – 90% solvent B was applied; the flow rate was 250 nl/min. The Orbitrap Elite instrument was operated essentially as described (Hüntel et al., 2015).

For protein identification and quantification, mass spectrometric data were processed using MaxQuant (version 1.3.0.5; Cox and Mann, 2008) and Andromeda (Cox et al., 2011) as described (Lytovchenko et al., 2014). The *Saccharomyces* Genome Database (SGD; [www.yeastgenome.org](http://www.yeastgenome.org)) was used for the database search. The option "Re-quantify" implemented in MaxQuant and applied to our data analysis generally allows for the calculation of a SILAC ratio in case a peptide is only present in the isotope-labeled or unlabeled form by assigning a peptide intensity for the missing counterpart from the background signals in MS spectra at the expected *m/z* value. A list of all proteins detected is provided in Table S1.

The presence or absence of a presequence was predicted using TargetP 1.1 (for Atm1 and Nde2) (Emanuelsson et al., 2000; Nielsen et al., 1997) or evaluated according to Vögtle et al. (2009) (for Mdl2, Mmt2, Coq2, Sdh3, Sdh4, Cox15 and Pam17), Vukotic et al. (2012) (for Rcf2) and Bohnert et al. (2015) (for Mic10). Transmembrane segments were predicted by using TMPred (Hofmann and Stoffel, 1993).

### **Analysis of Proteins Using SDS-PAGE and Blue Native Electrophoresis**

For separation of proteins using Tricine-SDS-PAGE, 10-16.5% discontinuous polyacrylamide gels (1 M Tris-HCl [pH 8.45], 0.1% [w/v] SDS) were employed using cathode buffer (100 mM Tris, 100 mM Tricine, 0.1% [w/v] SDS [pH 8.25]) and anode buffer (200 mM Tris-HCl [pH 8.9]). Alternatively, the non-polymerized separating gel (16%/6 M urea) was overlaid with 10% gel (w/o glycerol) that, after polymerization, was covered with a 4% sample gel (AB-6) (Schägger, 2006). For protein separation using the Tris-glycine buffer system, 12% or 16% discontinuous polyacrylamide gels were employed (Laemmli, 1970).

Steady state protein levels of mitochondria were analyzed by lysis of 10–320  $\mu$ g of mitochondria (protein amount) with Laemmli buffer (2% [w/v] SDS, 10% [v/v] glycerol, 60

mM Tris-HCl [pH 6.8], 0.01% [w/v] bromphenol blue, 1% [v/v]  $\beta$ -mercaptoethanol, 1 mM PMSF) followed by electrophoretic separation and Western blotting onto polyvinylidene fluoride membranes. Protein levels were determined using immunodecoration with enhanced chemiluminescence (Haan and Behrmann, 2007).

For blue native electrophoresis, 6–16.5% or 3–13% discontinuous polyacrylamide gels (50 mM Bis Tris-HCl [pH 7.0], 67 mM  $\epsilon$ -amino n-caproic acid) were used for separation (cathode buffer: 50 mM Tricine [pH 7.0], 15 mM Bis-Tris, (0.02% [w/v] Coomassie G); anode buffer: 50 mM Bis-Tris-HCl [pH 7.0]). For the analysis of steady state levels of protein complexes, 50–100  $\mu$ g of mitochondria (protein amount) were solubilized in 1% digitonin buffer (1% [w/v] digitonin, 20 mM Tris-HCl [pH 7.4], 0.1 mM EDTA, 50 mM NaCl, 10% [v/v] glycerol, 1 mM PMSF) and incubated for 15 min on ice. After removal of non-solubilized material by centrifugation, blue native loading dye was added (final concentration: 0.5% [w/v] Coomassie G-250, 50 mM  $\epsilon$ -amino n-caproic acid, 100 mM Bis-Tris-HCl [pH 7.0]) and the samples were loaded onto the blue native gel. After the running front had migrated into the running gel, the cathode buffer was exchanged with the buffer without Coomassie G (Schägger and von Jagow, 1991; Schägger et al., 1994).

### **IgG Affinity Chromatography**

Radiolabeled Sdh4 or Mmt2 precursor was imported into 1.2 mg (protein amount) of wild-type (WT, YPH499) or Oxa1<sub>ProtA</sub> mitochondria for 8–10 min at 30°C. Non-imported precursor was digested with proteinase K. Mitochondria were pelleted and the supernatant was discarded. To remove residual traces of radioactive precursor proteins, mitochondria were resuspended in SEM buffer and subjected to another clarifying spin. Subsequently WT or Oxa1<sub>ProtA</sub> mitochondria were mixed with 1.2 mg of untreated mitochondria of the other type. The mitochondrial mixture was solubilized in 2 ml of solubilization buffer (20 mM Tris-HCl [pH 7.4], 50 mM NaCl, 0.1 mM EDTA, 10% [v/v] glycerol, 1% [w/v] digitonin, 1.5 mM PMSF, 1x EDTA-free Protease Inhibitor Cocktail [Roche]). Non-solubilized material was pelleted by centrifugation and a portion of the soluble fraction was taken as load. 100  $\mu$ l of 50% slurry human IgG-coupled Sepharose beads were equilibrated with solubilization buffer and added to solubilized mitochondria followed by 90 min head-over-head incubation at 4°C. Beads were transferred to a mobicol column and washed 15-times with 500  $\mu$ l of wash buffer (20 mM Tris-HCl [pH 7.4], 60 mM NaCl, 0.5 mM EDTA, 10% [v/v] glycerol, 0.3% [w/v] digitonin, 1.5 mM PMSF, 1x EDTA-free Protease Inhibitor Cocktail [Roche]). Proteins specifically bound to IgG beads via Oxa1<sub>ProtA</sub> were eluted by incubation with tobacco etch virus (TEV) protease under vigorous shaking at 4°C overnight. Samples were subjected to SDS-PAGE and Western Blotting followed by autoradiography and antibody decoration.

## Antibodies Used in This Study

| Antigen         | Dilution               | Number                          | Secondary antibody |
|-----------------|------------------------|---------------------------------|--------------------|
| Aac2            | 1:500 TBS-T + 5% milk  | GR3617-7                        | anti-rabbit        |
| Atm1            | 1:200 TBS-T + 5% milk  | GR1641-7                        | anti-rabbit        |
| Atp4            | 1:500 TBS-T + 5% milk  | GR1970-4                        | anti-rabbit        |
| Atp20           | 1:500 TBS-T + 5% milk  | GR1516-4                        | anti-rabbit        |
| Dic1            | 1:200 TBS-T + 5% milk  | GR2054-5                        | anti-rabbit        |
| Coq2            | 1:50 TBS               | GR2097; affinity purified e1-e9 | anti-rabbit        |
| Cox1            | 1:400 TBS-T + 5% milk  | GR1538-4                        | anti-rabbit        |
| Cox11           | 1:200 TBS-T + 5% milk  | GR1102-2                        | anti-rabbit        |
| Mdl1            | 1:200 TBS-T + 5% milk  | GR1518-7                        | anti-rabbit        |
| Mdj2            | 1:400 TBS-T + 5% milk  | GR1842-7                        | anti-rabbit        |
| Mia40           | 1:750 TBS-T + 5% milk  | B315                            | anti-rabbit        |
| Mir1            | 1:1000 TBS-T + 5% milk | 171-5                           | anti-rabbit        |
| Mmt1            | 1:50 TBS               | GR2049; affinity purified e1-e6 | anti-rabbit        |
| Mmt2            | 1:25 TBS               | GR2090; affinity purified ++    | anti-rabbit        |
| Mrs2            | 1:25 TBS               | GR2093; affinity purified e5-e8 | anti-rabbit        |
| Ndi1            | 1:200 TBS-T + 5% milk  | GR809-4                         | anti-rabbit        |
| Oxa1            | 1:100 TBS-T + 5% milk  | 262-6                           | anti-rabbit        |
| Sam50           | 1:300 TBS-T + 5% milk  | B312-14                         | anti-rabbit        |
| Sdh1            | 1:1000 TBS-T + 5% milk | GR1849-3                        | anti-rabbit        |
| Sdh3            | 1:250 TBS-T + 5% milk  | GR2434-5                        | anti-rabbit        |
| Sdh4            | 1:2000 TBS-T + 5% milk | GR1855-3                        | anti-rabbit        |
| Pam16           | 1:200 TBS-T + 5% milk  | GR750-6                         | anti-rabbit        |
| Tim9            | 1:250 TBS-T + 5% milk  | GR2013-5                        | anti-rabbit        |
| Tim10           | 1:500 TBS-T + 5% milk  | 217-8                           | anti-rabbit        |
| Tim11/<br>Atp21 | 1:400 TBS-T + 5% milk  | 138-9                           | anti-rabbit        |
| Tim12           | 1:250 TBS-T + 5% milk  | GR906-7                         | anti-rabbit        |
| Tim13           | 1:1000 TBS-T + 5% milk | 238-5                           | anti-rabbit        |
| Tim18           | 1:1000 TBS-T + 5% milk | 233-7                           | anti-rabbit        |
| Tim22           | 1:500 TBS-T + 5% milk  | 164-4                           | anti-rabbit        |
| Tim23           | 1:500 TBS-T + 5% milk  | 133-9                           | anti-rabbit        |
| Tim50           | 1:500 TBS-T + 5% milk  | 257-8                           | anti-rabbit        |
| Tim54           | 1:1000 TBS-T + 5% milk | 215-6                           | anti-rabbit        |
| Tom40           | 1:750 TBS-T + 5% milk  | 168-4                           | anti-rabbit        |
| Yme1            | 1:400 TBS-T + 5% milk  | GR1435-3                        | anti-rabbit        |
| Yro2            | 1:200 TBS-T + 5% milk  | GR2095-4                        | anti-rabbit        |

## SUPPLEMENTAL REFERENCES

Berben, G., Dumont, J., Gilliquet, V., Bolle, P.A., and Hilger, F. (1991). The YDp plasmids: a uniform set of vectors bearing versatile gene disruption cassettes for *Saccharomyces cerevisiae*. *Yeast* 7, 475–477.

Bohnert, M., Zerbes, R.M., Davies, K.M., Mühleip, A.W., Rampelt, H., Horvath, S.E., Boenke, T., Kram, A., Perschil, I., Veenhuis, M., et al. (2015). Central role of Mic10 in the mitochondrial contact site and cristae organizing system. *Cell Metab.* 21, 747–755.

Cox, J., and Mann, M. (2008). MaxQuant enables high peptide identification rates, individualized p.p.b.-range mass accuracies and proteome-wide protein quantification. *Nature Biotechnol.* 26, 1367–1372.

Cox, J., Neuhauser, N., Michalski, A., Scheltema, R.A., Olsen, J.V., and Mann, M. (2011). Andromeda: a peptide search engine integrated into the MaxQuant environment. *J. Proteome Res.* 10, 1794–1805.

Emanuelsson, O., Nielsen, H., Brunak, S., and von Heijne, G. (2000). Predicting subcellular localization of proteins based on their N-terminal amino acid sequence. *J. Mol. Biol.* 300, 1005–1016.

Frazier, A.E., Dudek, J., Guiard, B., Voos, W., Li, Y., Lind, M., Meisinger, C., Geissler, A., Sickmann, A., Meyer, H.E., et al. (2004). Pam16 has an essential role in the mitochondrial protein import motor. *Nat. Struct. Mol. Biol.* 11, 226–233.

Frazier, A.E., Taylor, R.D., Mick, D.U., Warscheid, B., Stoepel, N., Meyer, H.E., Ryan, M.T., Guiard, B., and Rehling, P. (2006). Mdm38 interacts with ribosomes and is a component of the mitochondrial protein export machinery. *J. Cell Biol.* 172, 553–564.

Gambill, B.D., Voos, W., Kang, P.J., Miao, B., Langer, T., Craig, E.A., and Pfanner, N. (1993). A dual role for mitochondrial heat shock protein 70 in membrane translocation of preproteins. *J. Cell Biol.* 123, 109–117.

Gietz, R.D., and Woods R.A. (2002). Transformation of yeast by lithium acetate/single-stranded carrier DNA/polyethylene glycol method. *Methods Enzymol.* 350, 87–96.

Haan, C., and Behrmann, I. (2007). A cost effective non-commercial ECL-solution for Western blot detections yielding strong signals and low background. *J. Immunol. Methods* 318, 11–19.

Hofmann, K., and Stoffel, W. (1993). TMBASE – A database of membrane spanning protein segments. *Biol. Chem. Hoppe-Seyler* 374, 166.

Hünten, S., Kaller, M., Drepper, F., Oeljeklaus, S., Bonfert, T., Erhard, F., Dueck, A., Eichner, N., Friedel, C.C., Meister, G., et al. (2015). p53-regulated networks of protein, mRNA, miRNA, and lncRNA expression revealed by integrated pulsed stable isotope labeling with amino acids in cell culture (pSILAC) and next generation sequencing (NGS) analyses. *Mol. Cell. Proteomics* 14, 2609–2629.

Laemmli, U.K. (1970). Cleavage of structural proteins during the assembly of the head of bacteriophage T4. *Nature* 227, 680–685.

Longtine, M.S., McKenzie, A. 3rd, Demarini, D.J., Shah, N.G., Wach, A., Brachat, A., Philippsen, P., and Pringle, J.R. (1998). Additional modules for versatile and economical PCR-based gene deletion and modification in *Saccharomyces cerevisiae*. *Yeast* 14, 953–961.

Lytovchenko, O., Naumenko, N., Oeljeklaus, S., Schmidt, B., von der Malsburg, K.,

Deckers, M., Warscheid, B., van der Laan, M., and Rehling, P. (2014). The INA complex facilitates assembly of the peripheral stalk of the mitochondrial F<sub>1</sub>F<sub>o</sub>-ATP synthase. *EMBO J.* **33**, 1624–1638.

Nielsen, H., Engelbrecht, J., Brunak, S., and von Heijne, G. (1997). Identification of prokaryotic and eukaryotic signal peptides and prediction of their cleavage sites. *Protein Eng.* **10**, 1–6.

Schägger H. (2006). Tricine-SDS-PAGE. *Nat. Protoc.* **1**, 16–22.

Schägger, H., and von Jagow, G. (1991). Blue native electrophoresis for isolation of membrane protein complexes in enzymatically active form. *Anal. Biochem.* **199**, 223–231.

Schägger, H., Cramer, W.A., and von Jagow, G. (1994). Analysis of molecular masses and oligomeric states of protein complexes by blue native electrophoresis and isolation of membrane protein complexes by two-dimensional native electrophoresis. *Anal. Biochem.* **217**, 220–230.

Sikorski, R.S., and Hieter, P. (1989). A system of shuttle vectors and yeast host strains designed for efficient manipulation of DNA in *Saccharomyces cerevisiae*. *Genetics* **122**, 19–27.

Thomas, B.J., and Rothstein, R. (1989). Elevated recombination rates in transcriptionally active DNA. *Cell* **56**, 619–630.

Vögtle, F.N., Wortelkamp, S., Zahedi, R.P., Becker, D., Leidhold, C., Gevaert, K., Kellermann, J., Voos, W., Sickmann, A., Pfanner N., et al. (2009). Global analysis of the mitochondrial N-proteome identifies a processing peptidase critical for protein stability. *Cell* **139**, 428–439.

Vukotic, M., Oeljeklaus, S., Wiese, S., Vögtle, F.N., Meisinger, C., Meyer, H.E., Zieseniss, A., Katschinski, D.M., Jans, D.C., Jakobs, S., et al. (2012). Rcf1 mediates cytochrome oxidase assembly and respirasome formation, revealing heterogeneity of the enzyme complex. *Cell Metab.* **15**, 336–347.

Wach, A. (1996). PCR-synthesis of marker cassettes with long flanking homology regions for gene disruptions in *S. cerevisiae*. *Yeast* **15**, 259–265.

Wiedemann, N., Pfanner, N., and Ryan, M.T. (2001). The three modules of ADP/ATP carrier cooperate in receptor recruitment and translocation into mitochondria. *EMBO J.* **20**, 951–960.

**Table S1. Proteins Identified in Mitochondrial Fractions by Quantitative MS-Based Analysis of Wild-Type Versus *oxa1 cox18* Double Deletion Yeast (see Excel File), Related to Figure 1**

**Table S2. Yeast Strains Used in This Study, Related to Figures 1, 2 and 3**

| Strain                      | Description                                                                                                   | Genotype                                                                        | Source                                   | Number |
|-----------------------------|---------------------------------------------------------------------------------------------------------------|---------------------------------------------------------------------------------|------------------------------------------|--------|
| Wild-type (WT)              | YPH499                                                                                                        | <i>MATa ura3-52 lys2-801 ade2-101 trp1-Δ63 his3-Δ200 leu2-Δ1</i>                | Sikorski and Hieter, 1989                | 1501   |
| Wild-type (WT)              | W303-1A <i>MATa</i> ; WT for <i>oxa1-ts</i> strain                                                            | <i>MATa leu2-3,112 trp1-1 can1-100 ura3-1 ade2-1 his3-11,15</i>                 | Thomas and Rothstein, 1989               | 1045   |
| Wild-type (WT)              | YPH499; <i>pam16::ADE2</i> pFL39-PAM16; WT for <i>pam16-3</i>                                                 | YPH499 <i>pam16::ADE2</i> pFL39-PAM16                                           | Frazier et al., 2004                     | 3156   |
| Wild-type (WT)              | PK82; WT for <i>ssc1-3</i> (PK83)                                                                             | <i>MATα his4-713 lys2 ura3-52 leu2-3,112 Δtrp1</i>                              | Gambill et al., 1993                     | 2501   |
| Wild-type $\rho^0$          | YPH499 $\rho^0$ ; devoid of mitochondrial DNA; generated by ethidium bromide treatment                        | <i>MATa ura3-52 lys2-801 ade2-101 trp1-Δ63 his3-Δ200 leu2-Δ1; ρ<sup>0</sup></i> | Pfanner/Wiedemann Labs                   | 1519   |
| <i>oxa1Δ</i>                | Deletion of <i>OXA1</i> in YPH499 cells                                                                       | YPH499 <i>oxa1::HIS3MX6</i>                                                     | This study (A.E. Frazier and P. Rehling) | 1474   |
| <i>cox18Δ</i>               | Deletion of <i>COX18</i> in YPH499 cells (deletion of ORF (1-951) and 20 base pairs downstream of ORF)        | YPH499 <i>cox18::HIS3MX6</i>                                                    | This study (A.E. Frazier and P. Rehling) | 1526   |
| <i>oxa1Δ cox18Δ</i>         | Deletion of <i>OXA1</i> and <i>COX18</i> in YPH499 cells                                                      | YPH499 <i>oxa1::HIS3MX6 cox18::URA3</i>                                         | This study                               | 3754   |
| <i>oxa1-ts</i>              | <i>oxa1<sup>ts</sup></i> (L240S)                                                                              | W303-1A <i>MATa oxa1::OXA1<sup>L240S</sup></i>                                  | Hell et al., 2001; Preuss et al., 2001   | 2277   |
| <i>Oxa1<sub>ProtA</sub></i> | <i>Oxa1<sub>ProtA</sub></i> (chromosomal)                                                                     | YPH499 <i>oxa1::OXA1ProtAHIS3MX6</i>                                            | Frazier et al., 2006                     | 1522   |
| <i>ssc1-3</i>               | PK83                                                                                                          | <i>MATα ade2-101 lys2 ura3-52 leu2-3,112 Δtrp1 ssc1-3(LEU2)</i>                 | Gambill et al., 1993                     | 2503   |
| <i>pam16-3</i>              | Chromosomal deletion of <i>PAM16</i> complemented with temperature-sensitive <i>pam16-3</i> allele on plasmid | YPH499 <i>pam16::ADE2 pFL39-PAM16ts-3</i>                                       | Frazier et al., 2004                     | 3158   |
